# Supplementary material for: Fluorescent paper sensor fabricated by carbazole-based probes for dual visual detection of Cu2+and gaseous H2S
Source: Royal Society of Chemistry journal article supplement (doi:10.1039/c6ra10293j), 2016-01-01
Supplement: c6ra10293j1.pdf [file c6ra10293j1.pdf]

## Electronic Supporting Information

### Fluorescent paper sensor fabricated by carbazole-based probes for dual visual detections of $\text{Cu}^{2+}$ and gaseous $\text{H}_2\text{S}$

Linlin Yang,<sup>a</sup> Jianping Wang,<sup>a,b</sup> Liang Yang,<sup>a,b</sup> Cheng Zhang,<sup>a,c</sup> Ruilong Zhang,<sup>a,c</sup> Zhongping Zhang,<sup>a,b,c</sup> Bianhua Liu,<sup>\*a,b</sup> and Changlong Jiang<sup>\*a,b</sup>

<sup>a</sup> CAS Center for Excellence in Nanoscience, Institute of Intelligent Machines, Chinese Academy of Sciences, Hefei, Anhui 230031, China.

<sup>b</sup> State Key Laboratory of Transducer Technology, Chinese Academy of Sciences, Hefei, Anhui 230031, China.

<sup>c</sup> Department of Chemistry, University of Science and Technology of China, Hefei, Anhui 230026, China.

#### \* Corresponding authors

E-mail: bhliu@iim.ac.cn, cljiang@iim.ac.cn

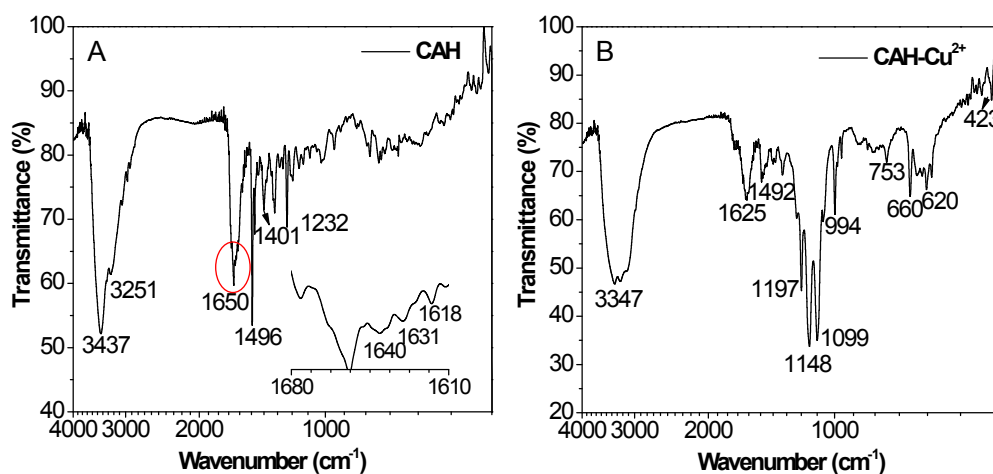

**Fig. S1** FT-IR spectra of compound (A) CAH and (B) CAH-Cu<sup>2+</sup>.

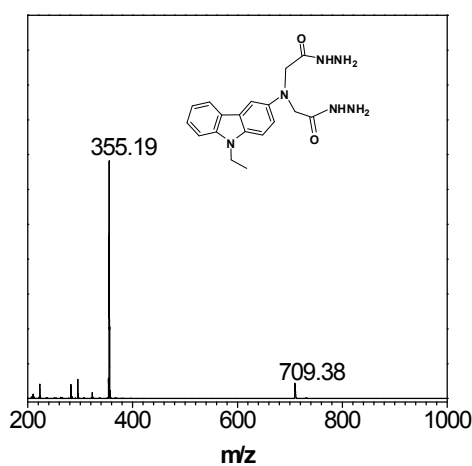

**Fig. S2** ESI-MS spectrum of CAH (positive mode, calculated for CAH [M+H]<sup>+</sup> = 355.19).

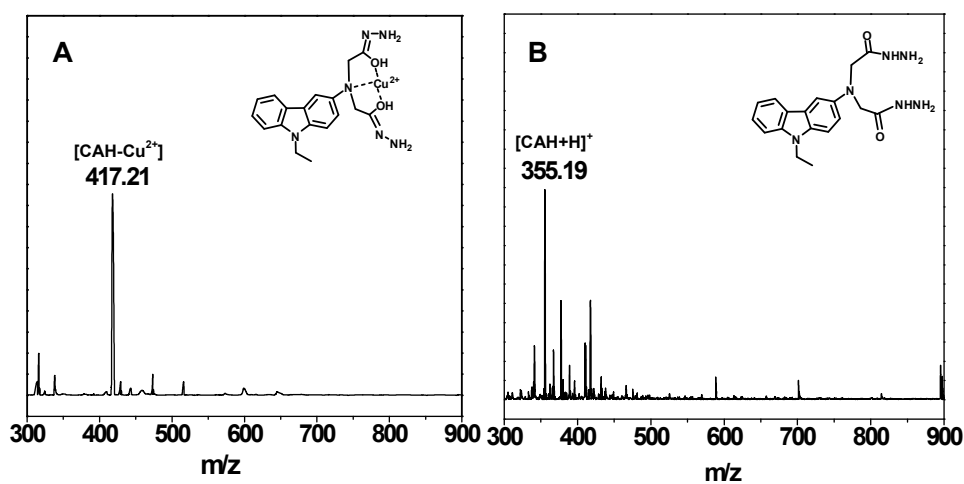

**Fig. S3** ESI-MS spectra of CAH-Cu<sup>2+</sup> before and after the addition of Na<sub>2</sub>S. The positive mode, calculated for (A) CAH-Cu<sup>2+</sup>, [CAH-Cu<sup>2+</sup>] = 417.11; (B) CAH-Cu<sup>2+</sup>+Na<sub>2</sub>S, [CAH+H]<sup>+</sup> = 355.19).

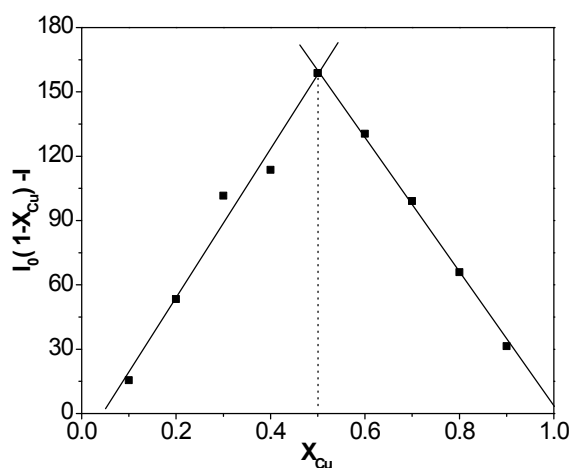

**Fig. S4** Job's plot for determining the stoichiometry of CAH and  $Cu^{2+}$  in HEPES buffer solution (10 mM HEPES, 1% DMF, pH= 7.4). The total concentration of CAH and  $Cu^{2+}$  is 5  $\mu M$ ,  $X_{Cu} = [Cu^{2+}]/([Cu^{2+}]+[CAH])$ .

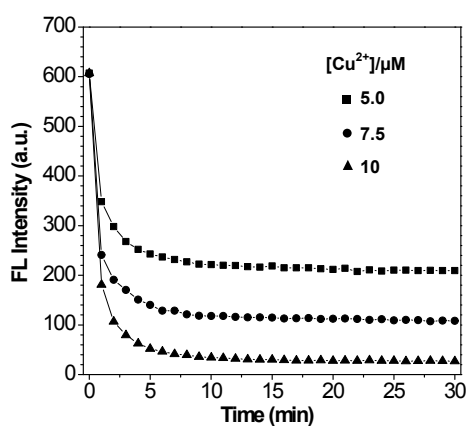

**Fig. S5** Time-dependent fluorescence intensity (425 nm) change of CAH (5  $\mu M$ ) with  $Cu^{2+}$  (5.0, 7.5 and 10  $\mu M$ ) in HEPES buffer solution (10 mM HEPES, 1% DMF, pH = 7.4).

**Photoluminescence quantum yield measurements:** Quinine sulfate in 0.1 M H<sub>2</sub>SO<sub>4</sub> (quantum yield 0.54 at 350 nm) was chosen as a standard for the fluorescence quantum yield measurement.<sup>S1</sup> The values are calculated using the standard reference sample that has a fixed and known fluorescence quantum yield value, according to the following equation:

$$QY_{\text{sample}} = QY_{\text{q}} \cdot \frac{A_{\text{sample}}}{A_{\text{q}}} \cdot \frac{F_{\text{q}}}{F_{\text{sample}}} \cdot \frac{\eta_{\text{sample}}^2}{\eta_{\text{q}}^2} \quad (1)$$

$$F = 1 - 10^{-D} \quad (2)$$

Where QY is the quantum yield,  $A$  is the measured integrated emission intensity, and  $F$  which is calculated by equation 2 is the fraction of light absorbed.  $D$  is the absorbance at the excitation wavelength, and  $\eta$  is the refractive index. The subscript “q” refers to the reference fluorophore quinine sulfate of known quantum yield. The results are presented in Fig. S4 and Table S1.

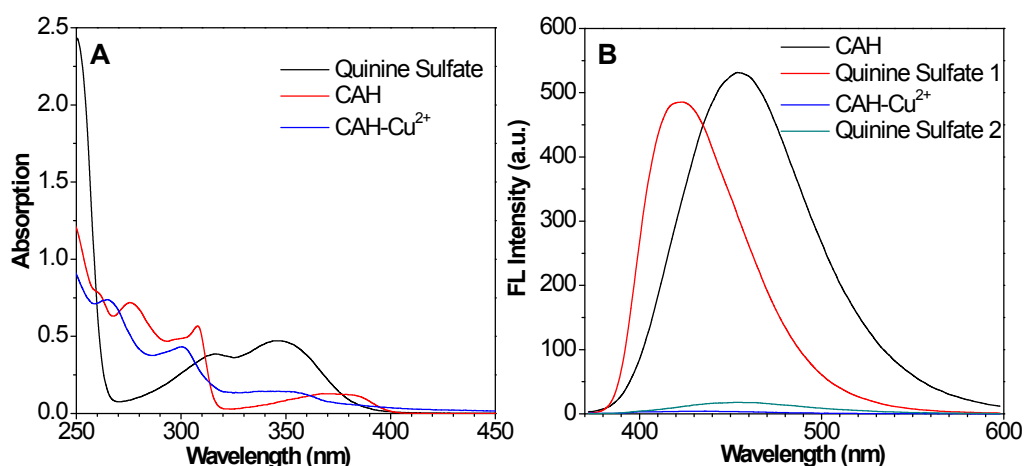

**Fig. S6** (A) UV-vis absorption of quinine sulfate (10  $\mu\text{M}$ ) in 0.1 M H<sub>2</sub>SO<sub>4</sub>, CAH (30  $\mu\text{M}$ ) and CAH-Cu<sup>2+</sup> (30  $\mu\text{M}$ ) in HEPES buffer solution (10 mM HEPES, 1% DMF, pH= 7.4). (B) Fluorescence spectra of quinine sulfate 1 (2.5  $\mu\text{M}$ ) and quinine sulfate 2 (78 nM) in 0.1 M H<sub>2</sub>SO<sub>4</sub>, CAH (10  $\mu\text{M}$ ) and CAH-Cu<sup>2+</sup> (10  $\mu\text{M}$ ) in HEPES buffer.

**Table S1.** Example for the fluorescence quantum yield calculation of CAH and CAH-Cu<sup>2+</sup> in HEPES buffer based on the standard.

| Sample               | A     | F <sub>350nm</sub>   | $\eta$ | $\Phi$ |
|----------------------|-------|----------------------|--------|--------|
| Quinine Sulfate 1    | 44132 | $2.8 \times 10^{-2}$ | 1.33   | 0.54   |
| CAH                  | 33429 | $2.8 \times 10^{-2}$ |        | 0.40   |
| Quinine Sulfate 2    | 1618  | $8.6 \times 10^{-4}$ |        | 0.54   |
| CAH-Cu <sup>2+</sup> | 372   | $3.7 \times 10^{-2}$ |        | 0.003  |

**Association constant calculation:** Generally, for the formation of 1:1 complexation species formed by the chemosensor compound and the guest cations, the following Benesi–Hildebrand equation was used:<sup>S2</sup>

$$\frac{1}{I - I_0} = \frac{1}{K_a (I_0 - I_{\min}) [\text{Cu}^{2+}]} + \frac{1}{I_0 - I_{\min}} \quad (3)$$

where  $I$  and  $I_0$  represent the fluorescence emission of CAH in the presence and absence of  $\text{Cu}^{2+}$ , respectively,  $I_{\min}$  is the saturated emission of CAH in the presence of excess amount of  $\text{Cu}^{2+}$ ;  $[\text{Cu}^{2+}]$  is the concentration of  $\text{Cu}^{2+}$  ion added, and  $K_a$  is the binding constant.

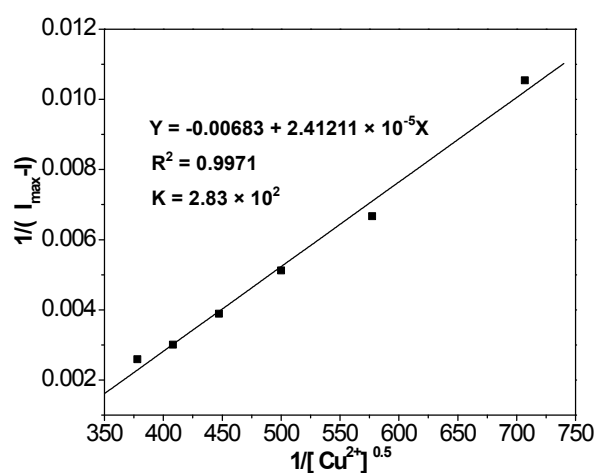

**Fig. S7** The binding constant ( $K$ ) of the CAH- $\text{Cu}^{2+}$  derived from the fluorescence titration data was found to be  $2.83 \times 10^2$  using Benesi-Hildebrand plot.

**The Detection Limit:** The limit of detection (LOD) was calculated on the basis of the fluorescence titration. The fluorescence emission spectrum of CAH was measured 10 times, and the standard deviation of blank measurement was achieved. The fluorescence intensity change at 425 nm versus a different concentration of  $\text{Cu}^{2+}$  was plotted.

So the detection limit was calculated with the following equation:<sup>S3,S4</sup>

$$\text{LOD} = 3\sigma/k \quad (4)$$

Where slope “ $k$ ” is the calibration sensitivity of the fluorescence intensity change ( $\Delta I = I_0 - I$ ) vs.  $[\text{Cu}^{2+}]$ , and “ $\sigma$ ” is the standard deviation of the blank signal ( $I_0$ ) obtained without  $\text{Cu}^{2+}$ .

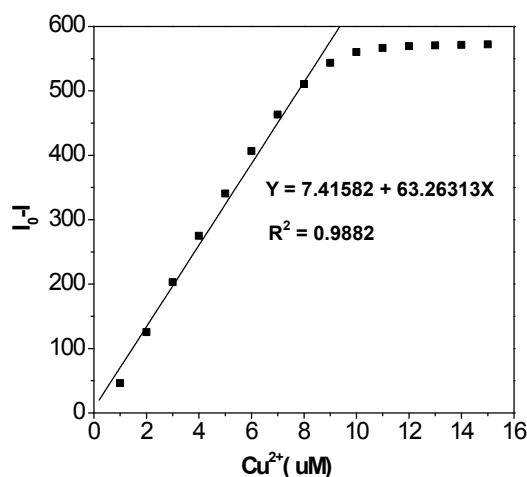

**Fig. S8** Linear relationship between fluorescence intensity of CAH (5  $\mu\text{M}$ ) at 425 nm versus the concentration of  $\text{Cu}^{2+}$ . The detection limit of  $\text{Cu}^{2+}$  is 65 nM.

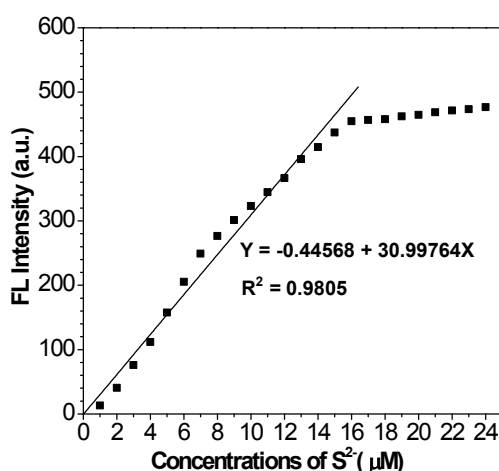

**Fig. S9** Linear relationship between fluorescence intensity of CAH- $\text{Cu}^{2+}$  (5  $\mu\text{M}$ ) at 425 nm versus the concentration of  $\text{H}_2\text{S}$ . The detection limit of  $\text{S}^{2-}$  is 0.29  $\mu\text{M}$ .

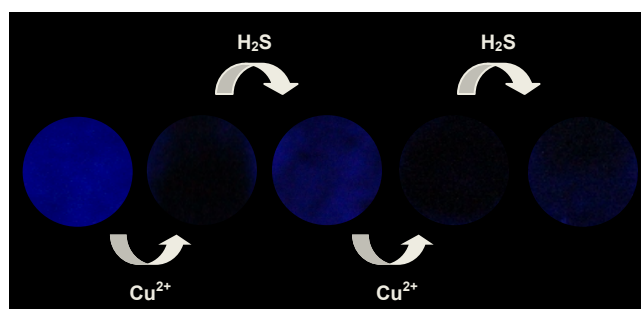

**Fig. S10** The fluorescence changes of paper sensor by alternately dropping the solution of  $\text{Cu}^{2+}$  ( $10^{-3}$  M) and being exposed in gaseous  $\text{H}_2\text{S}$  (120 ppm) for 2 times. The corresponding photographs were taken at a 365 nm UV lamp.

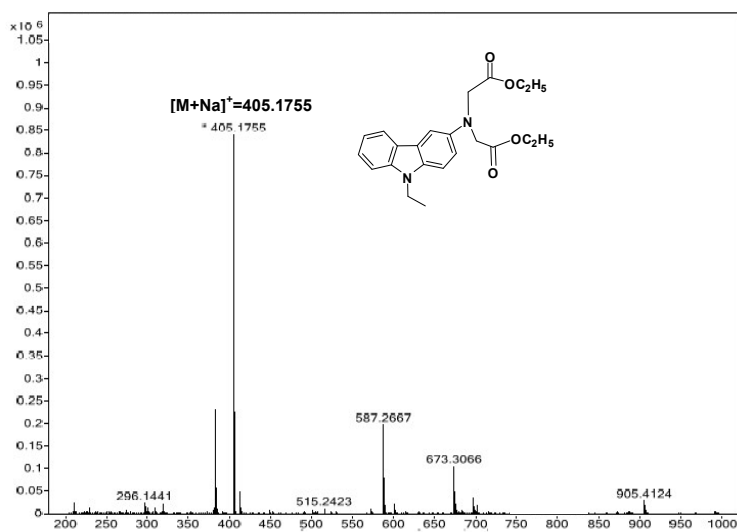

**Fig. S11** ESI-MS spectrum of intermediate 2 (positive mode, calculated for intermediate 2  $[\text{M}+\text{Na}]^+ = 405.1790$ ).

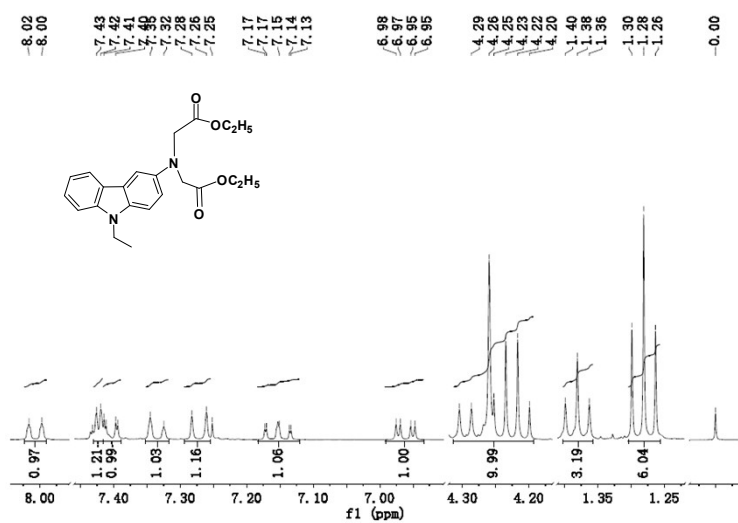

Fig. S12 <sup>1</sup>H NMR spectrum of intermediate 2 (CDCl<sub>3</sub>).

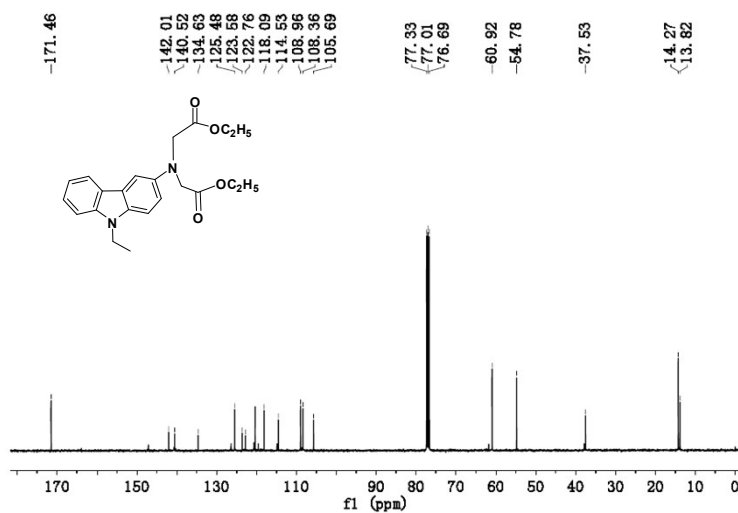

Fig. S13 <sup>13</sup>C NMR spectrum of intermediate 2 (CDCl<sub>3</sub>).



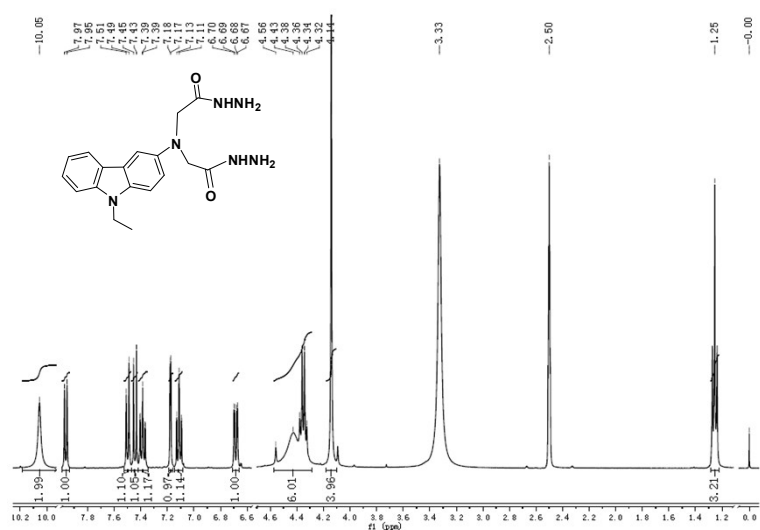

Fig. S14  $^1\text{H}$  NMR spectrum of compound CAH ( $\text{d}_6$ -DMSO).

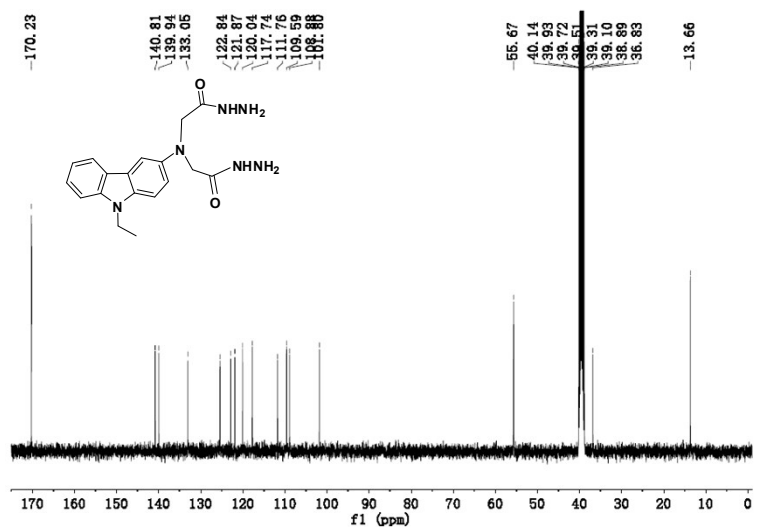

Fig. S15  $^{13}\text{C}$  NMR spectrum of compound CAH ( $\text{d}_6$ -DMSO).

## References:

- S1 Q. S. Mei, K. Zhang, G. J. Guan, B. H. Liu, S. H. Wang and Z. P. Zhang, *Chem. Commun.*, 2010, **46**, 7319.
- S2 H. A. Benesi, J. H. Hildebrand, *J. Am. Chem. Soc.*, 1949, **71**, 2703.
- S3 R. Koteeswari, P. Ashokkumar, E. J. P. Malar, V. T. Ramakrishnan and P. Ramamurthy, *Chem. Commun.*, 2011, **47**, 7695.
- S4 K. Chirantan, D. A. Manab, R. Aiyagari and D. Gopal, *Inorg. Chem.*, 2013, **52**, 743.
